# Supplementary material for: A modified UNIFAC-ZM model and phase equilibrium prediction of silicone polymers with ABE solution
Source: Royal Society of Chemistry journal article supplement (doi:10.1039/c6ra02037b), 2016-01-01
Supplement: c6ra02037b1.pdf [file c6ra02037b1.pdf]

Tab. 3  $\overline{\gamma^\infty}$  of the solvents in PDMS

| $T(K)$ |                            | Solvents |         |        |       |       |       |       |
|--------|----------------------------|----------|---------|--------|-------|-------|-------|-------|
|        |                            | Hexane   | Heptane | Octane | A     | B     | E     | W     |
| 373.2  | $\overline{\gamma^\infty}$ | 20.44    | 21.97   | 22.93  | 35.55 | 48.42 | 59.68 | 73.36 |
|        | SD                         | 0.06     | 0.42    | 0.25   | 1.02  | 0.03  | 2.09  | 0.91  |
| 383.2  | $\overline{\gamma^\infty}$ | 15.77    | 17.53   | 18.57  | 33.16 | 42.26 | 45.34 | 59.56 |
|        | SD                         | 0.35     | 0.25    | 0.15   | 0.27  | 0.77  | 2.32  | 1.04  |
| 393.2  | $\overline{\gamma^\infty}$ | 13.23    | 14.52   | 15.62  | 28.59 | 32.77 | 38.12 | 48.48 |
|        | SD                         | 0.15     | 0.32    | 0.21   | 0.50  | 1.21  | 0.80  | 1.07  |
| 403.2  | $\overline{\gamma^\infty}$ | 11.01    | 12.40   | 13.67  | 21.92 | 25.98 | 31.37 | 39.10 |
|        | SD                         | 0.23     | 0.21    | 0.45   | 0.29  | 0.72  | 0.23  | 0.50  |
| 413.2  | $\overline{\gamma^\infty}$ | 9.74     | 10.71   | 12.10  | 18.36 | 22.68 | 23.08 | 31.53 |
|        | SD                         | 0.08     | 0.21    | 0.25   | 0.19  | 1.41  | 0.68  | 0.50  |

$\overline{\gamma^\infty}$  : Average value of three  $\gamma^\infty$

SD: Standard Deviation

Tab. 4 Group interaction parameters of  
 the original UNIFAC model and the original UNIFAC-ZM model

| m                    | n     |        |       |        |       |
|----------------------|-------|--------|-------|--------|-------|
|                      | 1     | 5      | 7     | 9      | 43    |
| 1.CH <sub>2</sub>    | 0     | 986.5  | 1318  | 476.4  | 327   |
| 5.OH                 | 156.4 | 0      | 353.5 | 84.00  | 202.7 |
| 7.H <sub>2</sub> O   | 300.0 | -229.1 | 0     | -195.4 | 252.7 |
| 9.CH <sub>3</sub> CO | 26.76 | 164.5  | 472.5 | 0      | -     |
| 43.SiO               | 110.2 | 84.85  | 110.2 | -      | 0     |
